# Supplementary figures and images for: N-Doped branched carbon nanofibers@S as a cathode for lithium–sulfur batteries
Source: Royal Society of Chemistry journal article supplement (doi:10.1039/d3nj00279a), 2023-01-01

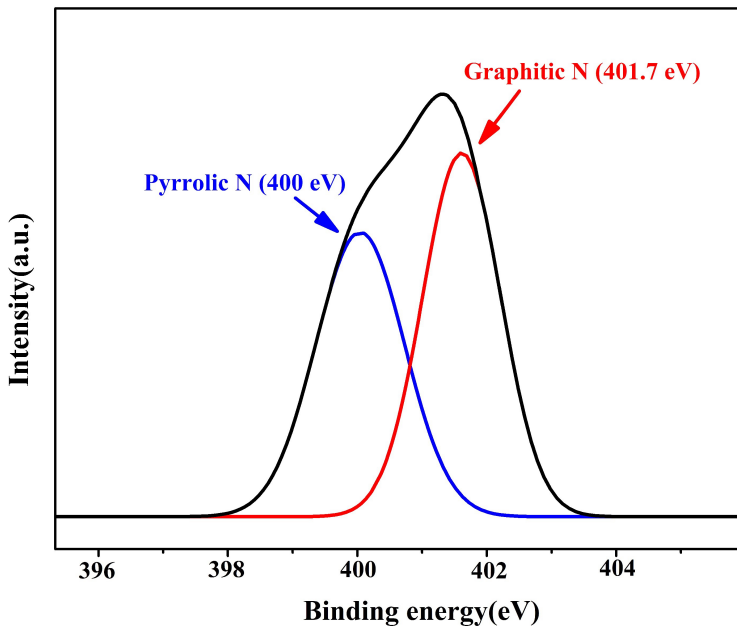

Supplement: d3nj00279a10.pdf [file d3nj00279a10.pdf]

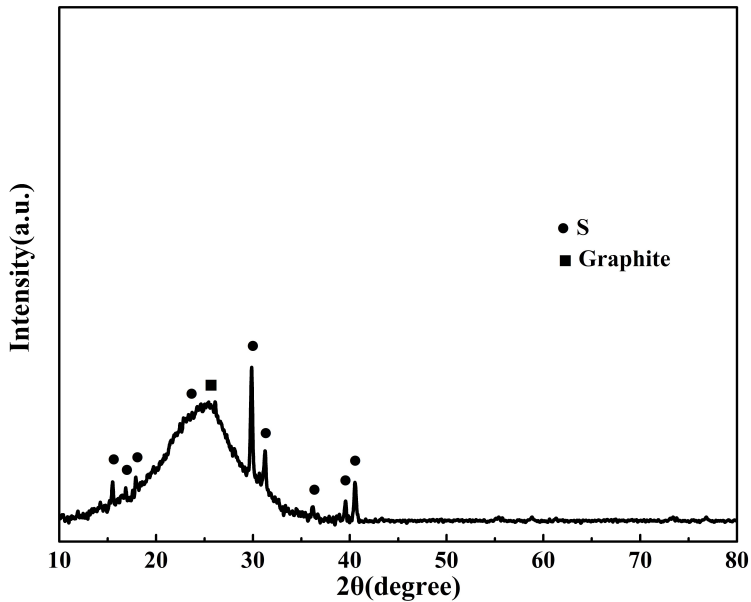

Supplement: d3nj00279a2.pdf [file d3nj00279a2.pdf]

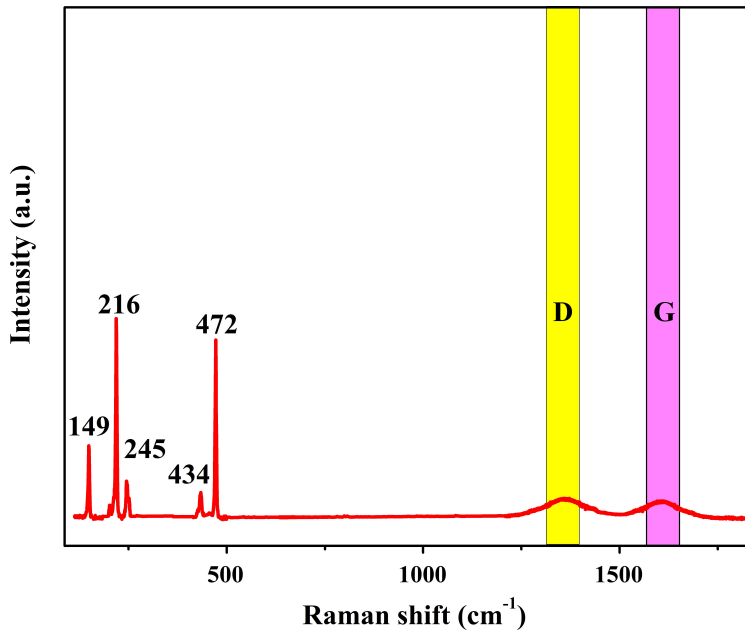

Supplement: d3nj00279a3.pdf [file d3nj00279a3.pdf]

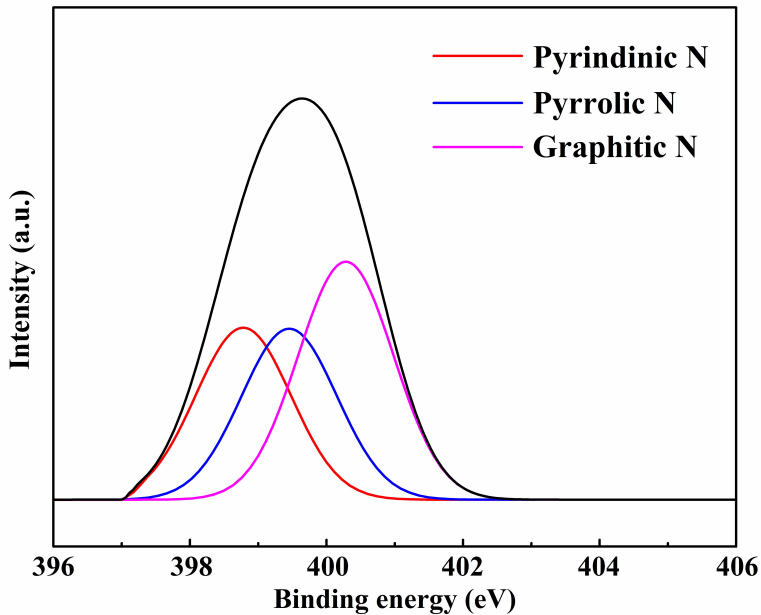

Supplement: d3nj00279a4.pdf [file d3nj00279a4.pdf]

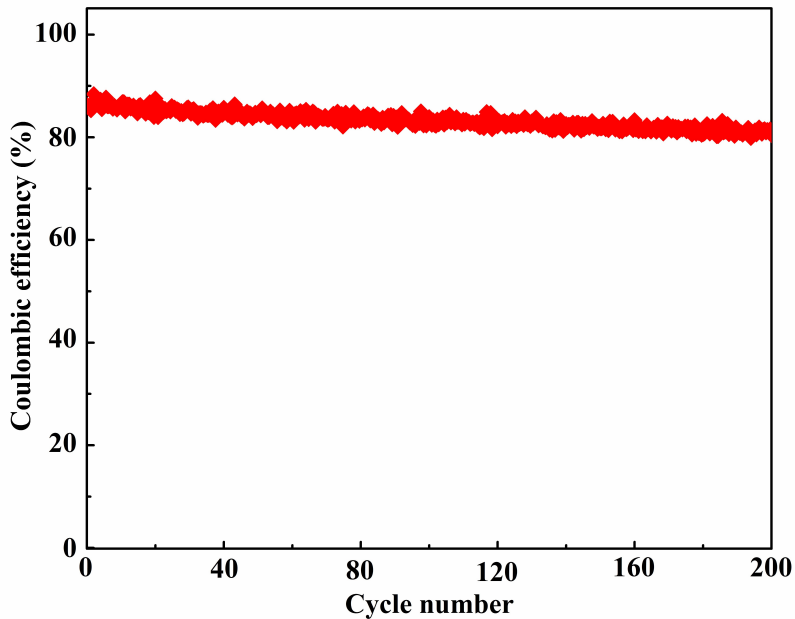

Supplement: d3nj00279a5.pdf [file d3nj00279a5.pdf]

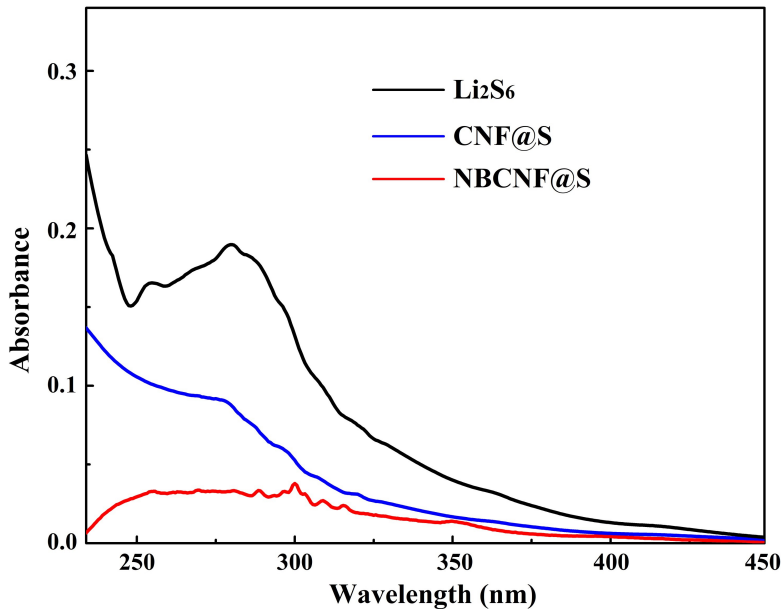

Supplement: d3nj00279a6.pdf [file d3nj00279a6.pdf]

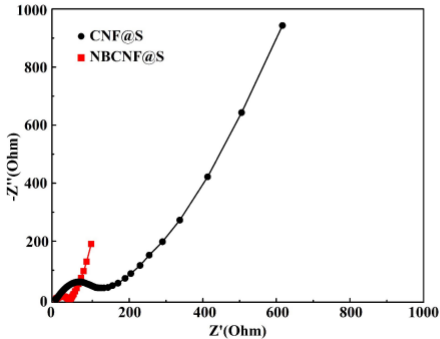

Supplement: d3nj00279a7.pdf [file d3nj00279a7.pdf]

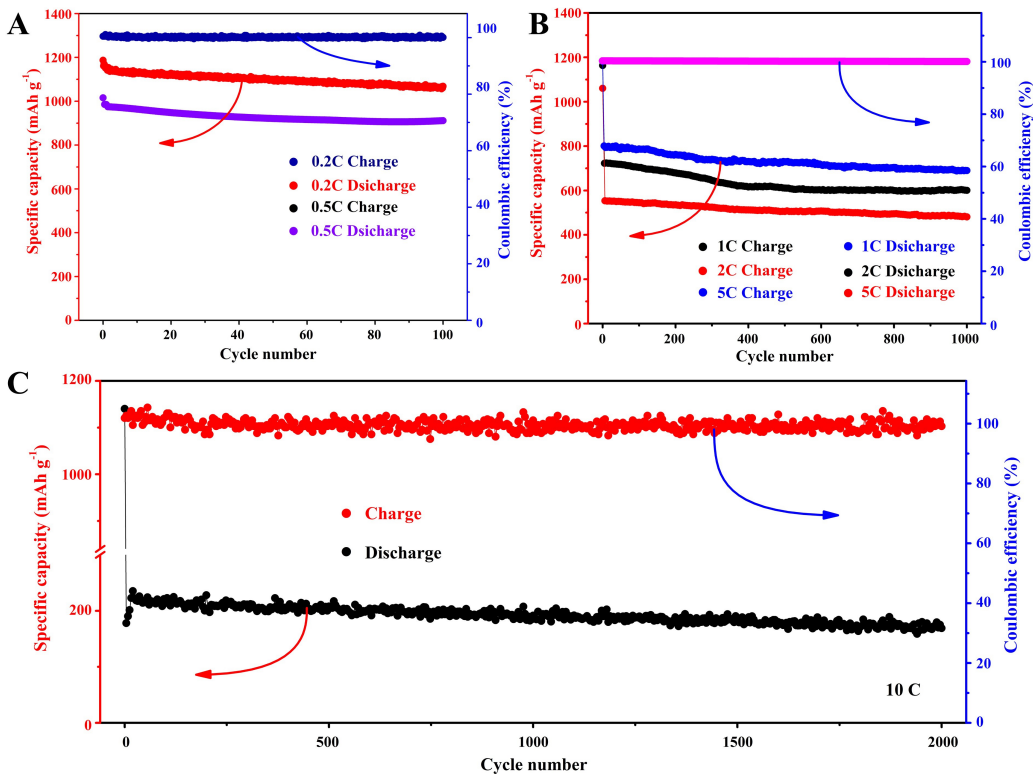

Supplement: d3nj00279a8.pdf [file d3nj00279a8.pdf]

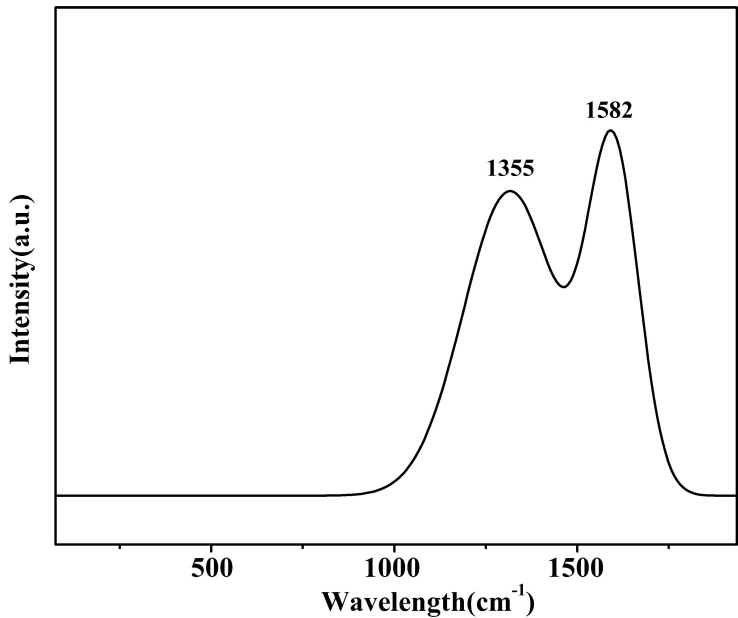

Supplement: d3nj00279a9.pdf [file d3nj00279a9.pdf]
